# Supplementary material for: scMNMF: a novel method for single-cell multi-omics clustering based on matrix factorization
Source: PubMed Central journal article supplement (PMC11097994; doi:10.1093/bib/bbae228), 2024-05-16
Supplement: scmnmf_support_clean_bbae228.pdf [file scmnmf_support_clean_bbae228.pdf]

## Support materials

### 1 Optimization of the scMNMF model

Since the scMNMF objective function is non-convex, we use an iterative strategy to solve it, where one variable is optimized by fixing the other variables, and the iterations continue until the algorithm converges to reach the termination standard. The objective function is as follows

$$\begin{aligned} \mathcal{O} &= R_{W, H_1, \dots, H_M} + Q_{B, F} \\ &= \sum_{k=1}^M \|X_k - WH_k\|^2 + \lambda_k \|H_k\|_1 + \sum_{i=1}^n \mu_i \|w_i\|_1 \\ &\quad + \|W - BF\|^2 + \alpha \text{Tr}(BLB^\top) \\ \text{s.t. } &W \geq 0, B \geq 0, F \geq 0. \end{aligned} \quad (1)$$

let  $\Phi_1, \Phi_2, \Phi_3$  be the Lagrange multiplier for constraints  $W \geq 0, B \geq 0, F \geq 0$ , then Lagrange L of scMNMF objective function is

$$L = \mathcal{O} + \text{Tr}(\Phi_1 W^\top) + \text{Tr}(\Phi_2 B^\top) + \text{Tr}(\Phi_3 F^\top).$$

Considering the presence of the L1-norm, here we use the ADMM (Alternating Direction Method of Multipliers) algorithm to optimize this problem. Take into account the Karush-Kuhn-Tucker (KKT) conditions, and then calculating the partial derivatives of  $W, H_k, B, F$ , respectively, we have

$$\begin{aligned} \frac{\partial L}{\partial W} &= \left( 2 \sum_{k=1}^M X_k H_k^\top \right) + 2BF + \sigma E + T - \left( 2 \sum_{k=1}^M WH_k H_k^\top \right) \\ &\quad - 2W - \sigma W \\ \frac{\partial L}{\partial H_k} &= 2W^\top X_k + \sigma_1 C_k + T_k - 2W^\top WH_k - \sigma_1 H_k \\ \frac{\partial L}{\partial B} &= WF^\top - BFF^\top - \alpha BL \\ \frac{\partial L}{\partial F} &= -2B^\top W + 2B^\top BF \end{aligned} \quad (2)$$

where  $\sigma, \sigma_1 > 0$  are penalty parameter,  $T, T_k$  are Lagrange multiplier. Then we can get the update rules and summarize the algorithm as follows

### 2 Convergence analysis

We conducted a convergence analysis on the iterative formulas of each variable obtained by the alternating iterative method. For each variable, we discussed its convergence and attempted to find the optimal solution. Here, we will only discuss  $W$ , and the same applies to  $H_k, B, \text{and } F$ . Construct a auxiliary function  $G(W, W^t)$ , let diagonal matrix

$$L_{ij}(W^t) = \delta_{ij} \frac{\left[ 2 \sum_{k=1}^M WH_k H_k^\top + (2 + \sigma)W \right]_{pi}}{W_{pi}^t} \quad (3)$$

then

$$\begin{aligned} G(W, W^t) &= F(W^t) + (W - W^t)^\top \nabla_W F(W^t) \\ &\quad + \frac{1}{2} (W - W^t)^\top L(W^t) (W - W^t). \end{aligned}$$

take the second-order Taylor expansion of  $F(W)$ .

**Algorithm 1** Optimize our proposed model by alternatingly updating

- 1: **Input:** single-cell multi-omics data matrix  $X_k$ , parameters  $p, k_1, \alpha$ .
- 2: **Initialize:** Initialize  $W, H_k, B, F$ , maximum number of iterations and stop error.
- 3: **Iterate the following processes until convergence:**

$$\begin{aligned} W &\leftarrow W \frac{\left( 2 \sum_{k=1}^M X_k H_k^\top \right) + 2BF + \sigma E + T}{W \left[ \left( 2 \sum_{k=1}^M H_k H_k^\top \right) + (2 + \sigma)I \right]} \\ H_k &\leftarrow H_k \frac{2W^\top X_k + \sigma_1 C_k + T_k}{2W^\top WH_k + \sigma_1 H_k} \\ B &\leftarrow B \frac{WF^\top}{BFF^\top + \alpha BL} \\ F &\leftarrow F \frac{B^\top W}{B^\top BF} \\ E &= S_{\mu/\sigma} \left( W - \frac{T}{\sigma} \right) \\ T &= T + \sigma(E - W) \\ C_k &= S_{\lambda_k/\sigma_1} \left( H_k - \frac{T_k}{\sigma_1} \right) \\ T_k &= T_k + \sigma_1 (C_k - H_k) \end{aligned}$$

where  $\text{Soft}(x) := \text{sgn}(x)(|x| - y)_+, (x)_+ = \max(x, 0)$

4: **Output:**  $W, H_k, B, F$

$$\begin{aligned} F(W) &= F(W^t) + (W - W^t)^\top \nabla_W F(W^t) \\ &\quad + \frac{1}{2} (W - W^t)^\top \nabla_W^2 F(W^t) (W - W^t). \end{aligned}$$

now we only need prove  $G(W, W^t) \geq F(W)$ , then  $G(W, W^t)$  is the auxiliary function of  $F(W)$ .

$$\nabla_W^2 F(W) = \frac{\partial \nabla_W F(W)}{\partial W^\top} = 2 \sum_{k=1}^M H_k H_k^\top + (2 + \sigma)I.$$

then

$$\begin{aligned} G(W, W^t) - F(W) &= \\ &= \frac{1}{2} (W - W^t)^\top \left[ L(W^t) (W - W^t) - \nabla_W^2 F(W^t) (W - W^t) \right]. \end{aligned}$$

let

$$M_{ij}(W^t) = W_{ij} \left[ L(W^t) - \nabla_W^2 F(W^t) \right]_{ij} W_j^t.$$

The following is a proof that matrix  $M_{ij}$  is positive semi-definite.

$$\begin{aligned}
\nu^\top M \nu &= \sum_{ij} v_i M_{ij} v_j \\
&= \sum_{ij} v_i W_i^t L(W^t)_{ij} W_j^t v_j - v_i W_i^t \nabla_W^2 F(W^t)_{ij} W_j^t v_j \\
&= \sum_{ij} 2 \sum_{k=1}^M (H_k H_k^\top)_{ij} W_i^t W_j^t v_i^2 + \sum_{ij} (2 + \sigma) W_i^t W_j^t v_i^2 \\
&\quad - \sum_{ij} 2 \sum_{k=1}^M (H_k H_k^\top)_{ij} W_i^t W_j^t v_i v_j - \sum_{ij} (2 + \sigma) W_i^t W_j^t v_i^2 \\
&= \sum_{k=1}^M \sum_{ij} (H_k H_k^\top)_{ij} W_i^t W_j^t (v_i - v_j)^2 \geq 0.
\end{aligned}$$

for

$$\frac{\partial G(W \cdot W^t)}{\partial W} = 0$$

we have

$$\begin{aligned}
W^{t+1} &= W^t - L^{-1}(W^t) \nabla_W (F(W^t)) \\
&\leftarrow W^t \frac{2 \sum_{k=1}^M X_k H_k^\top + 2BF + \sigma E + T}{2 \sum_{k=1}^M W H_k H_k^\top + (2 + \sigma)W}.
\end{aligned}$$

Consequently, it converges in accordance with the iterative process.

### 3 Parameter selection

The parameters  $p$ ,  $k_1$  represent the number of latent variables used for dimension reduction and the number of clusters (i.e., the number of cell types). For the parameter  $p$ , we use the instability-based NMF model to calculate the specific value. scNMF algorithm runs  $t$  times with random initial solutions and gets  $t$  basis matrices, denoted as  $M_1, \dots, M_t$ . Support two matrices  $M_1$  and  $M_2$ , a  $t \times t$  matrix  $G$  is defined where the element  $g_{ij}$  is the cross correlation between the  $i$ -th column of the matrix  $M_1$  and the  $j$ -th column of matrix  $M_2$ . Then the dissimilarity between  $M_1$  and  $M_2$  is defined as

$$\text{diss}(M_1, M_2) = \frac{1}{2p} \left( 2p - \sum_j \max_i g_{ij} - \sum_i \max_j g_{ij} \right)$$

Where  $g_{ij}$  denotes the  $j$ -th column of matrix  $G$ . The instability is the discrepancy of all the basis matrices for  $p$ , which is defined as

$$\gamma(p) = \frac{2}{t(t-1)} \sum_{1 \leq i < j \leq t} \text{diss}(M_i, M_j)$$

The  $p$  corresponding to the minimal  $\gamma(p)$  is selected as the number of rows in  $G$ . For the parameters  $k_1$ , considering partial label information is known, then the number of clusters can be directly taken as the value of parameter  $k_1$ . We use cross validation to find the optimal values for  $\mu_i$ , however, all  $\mu_i$  have been set to 0.5 in the experiment to save computational time since the clustering performance is insensitive to the parameter. The parameters  $\lambda_k$  and  $\alpha$  are used to balance the strength of the fitting term and the regularization term. Similar to the DRjCC model, we define

the values of the two parameters as follows:

$$\lambda_k = \frac{\|X_k\|_2}{\|H_k\|_2}, \quad \alpha = \frac{\|W\|_2}{\|B\|_2}. \quad (4)$$

Then  $\lambda_k$  and  $\alpha$  are automatically updated according to this formula.

## 4 Data pre-processing

Before the experiment, we preprocessed the input single-cell multi-omics data matrix  $X_k$  with the following steps:

1. Delete genes that are not expressed on all cells.
2. Filtering out genes that are only present in a small number of cells.
3. Log transformation and normalization.

## 5 Informative gene selection

The selection of informative genes involves determining how many informative genes to choose and how to extract them. Here are the steps we take to select informative genes:

1. Normalize the matrix  $H$  such that the mean of each row is 0.
2. Calculate the eigenvalues and corresponding eigenvectors of the matrix  $HH^T$ . Arrange them in descending order of eigenvalues, denoted as  $\lambda_1 > \dots > \lambda_n$  and  $\mathbf{y}_1, \dots, \mathbf{y}_n$  respectively.
3. Select the number  $k$  of informative genes: For the selection of  $k$ , we choose the value of  $k$  such that the cumulative contribution of the largest  $k$  eigenvalues is greater than a threshold  $\delta$ , i.e.,  $k = \arg \min_l \sum_{i=1}^l \lambda_i / \sum_{i=1}^n \lambda_i \geq \delta$ . Here, we set the threshold  $\delta$  to 0.95.
4. Define the weight of the  $i$ -th gene as  $\beta_i = \sum_{j=1}^k \lambda_j y_{ji}$ , and select the top  $k$  genes based on the weights in descending order.

We selected 28 informative genes from the 10X\_10K dataset using this approach, which refer to Table 1 for the specific gene names.

## 6 Support table and figures

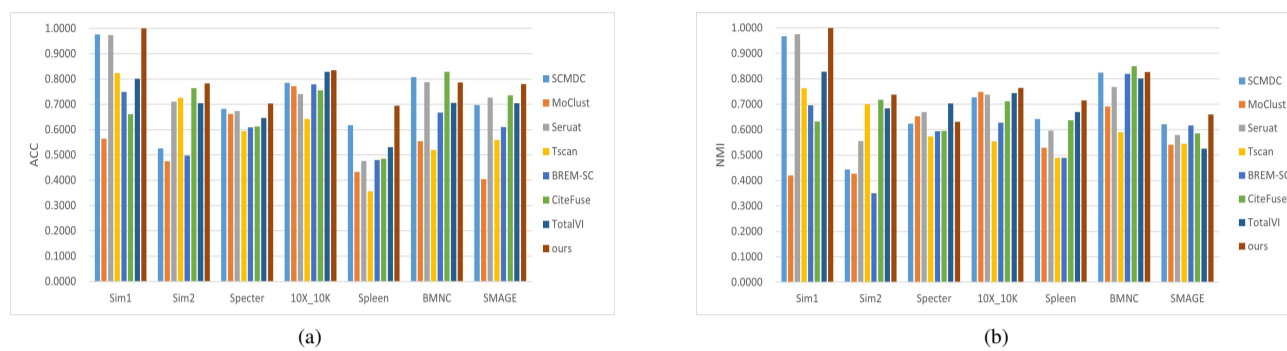

Fig. 1. ACC, NMI of different algorithms on 2 simulated datasets and 5 real single-cell multi-omics datasets.

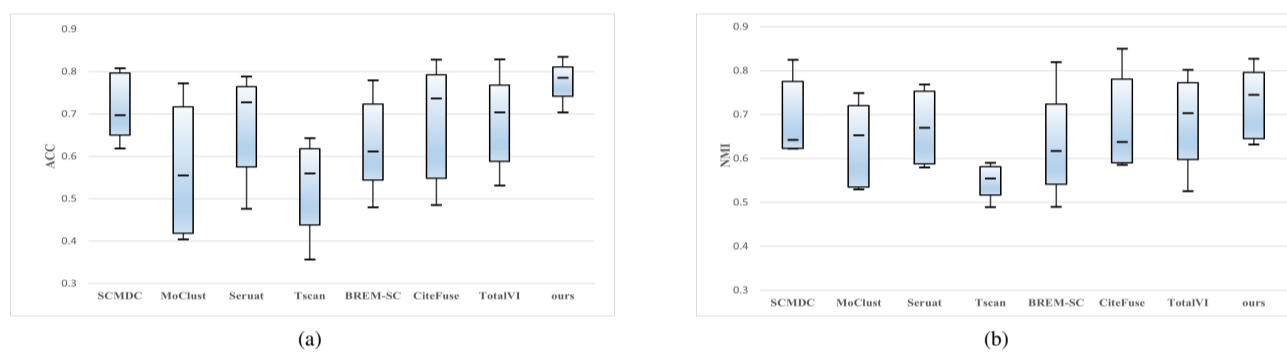

Fig. 2. Boxplots of different algorithms on 5 real single-cell multi-omics datasets.

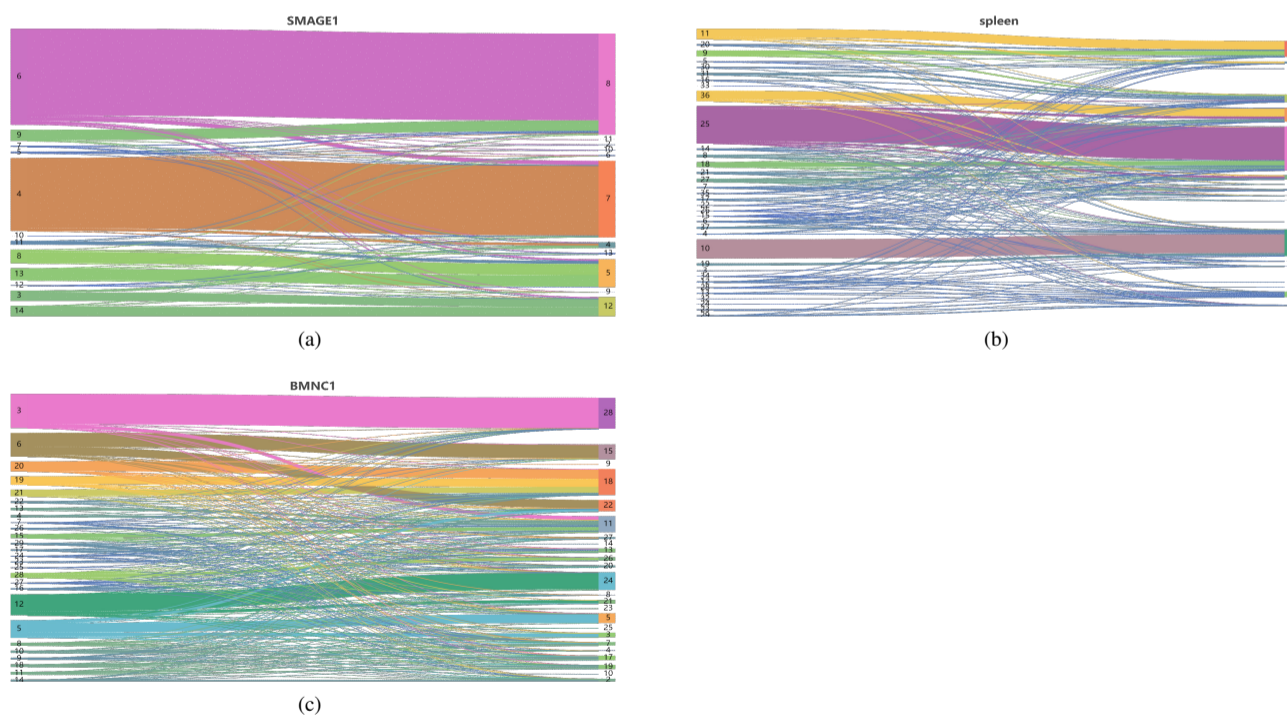

Fig. 3. Sankey plots: (a)"SMAGE dataset", (b)"Spleen dataset", (c)"BMNC dataset".

Table 1. Maker gene for 10X\_10K dataset, where the bolded genes indicated a significant correlation with the survival time of patients.

|       |          |        |        |
|-------|----------|--------|--------|
| ACOT7 | YBX1     | DEPDC1 | MYL9   |
| CDC20 | GATA2    | FCGR2B | ORC1   |
| FANCI | RRM2     | CDCA8  | PRDX1  |
| C1QB  | HELLS    | NASP   | FCGR2B |
| OSTC  | DDOST    | CKS1B  | RPN2   |
| SPARC | GP9      | LAMP5  | WARS   |
| UGCG  | IGHV3-30 | PAICS  | KIF23  |

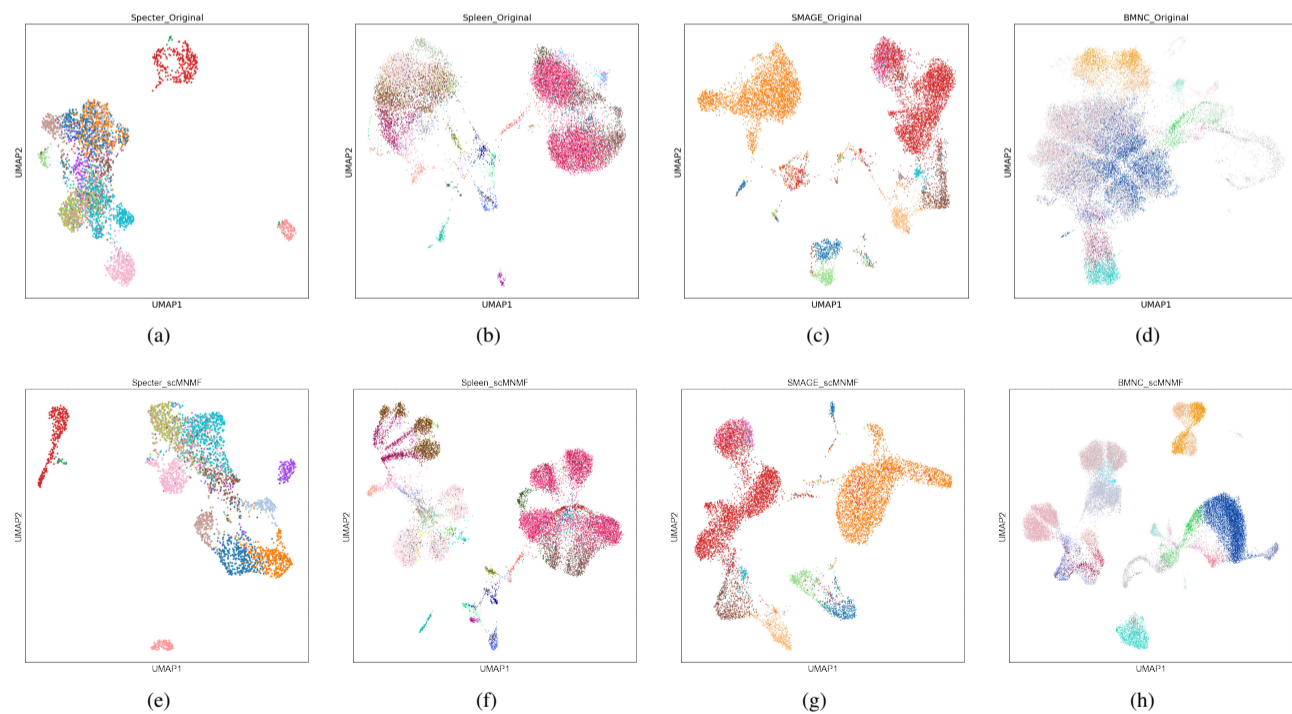

Fig. 4. Visualization of cell clusters before and after dimension reduction of the other four datasets.



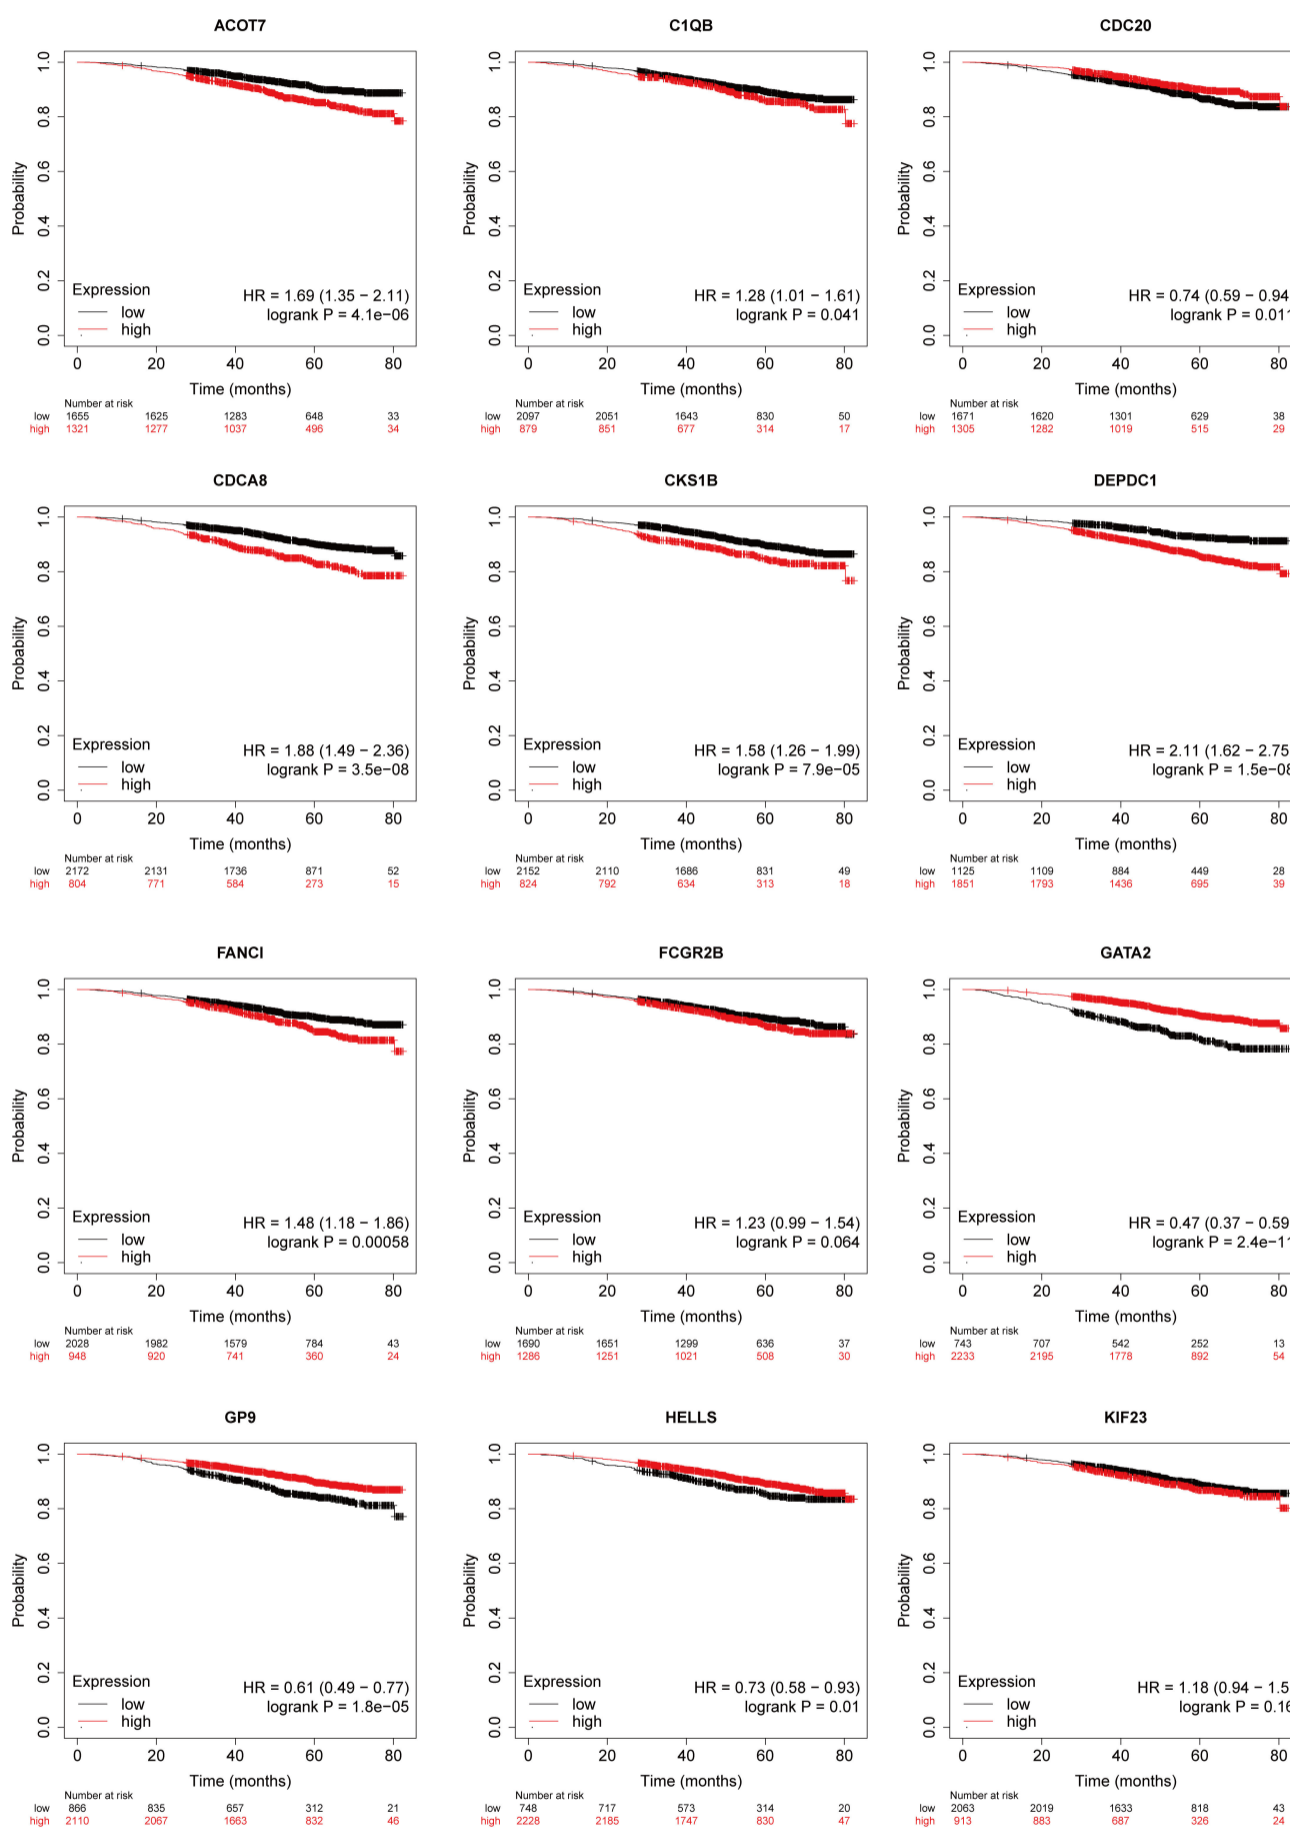

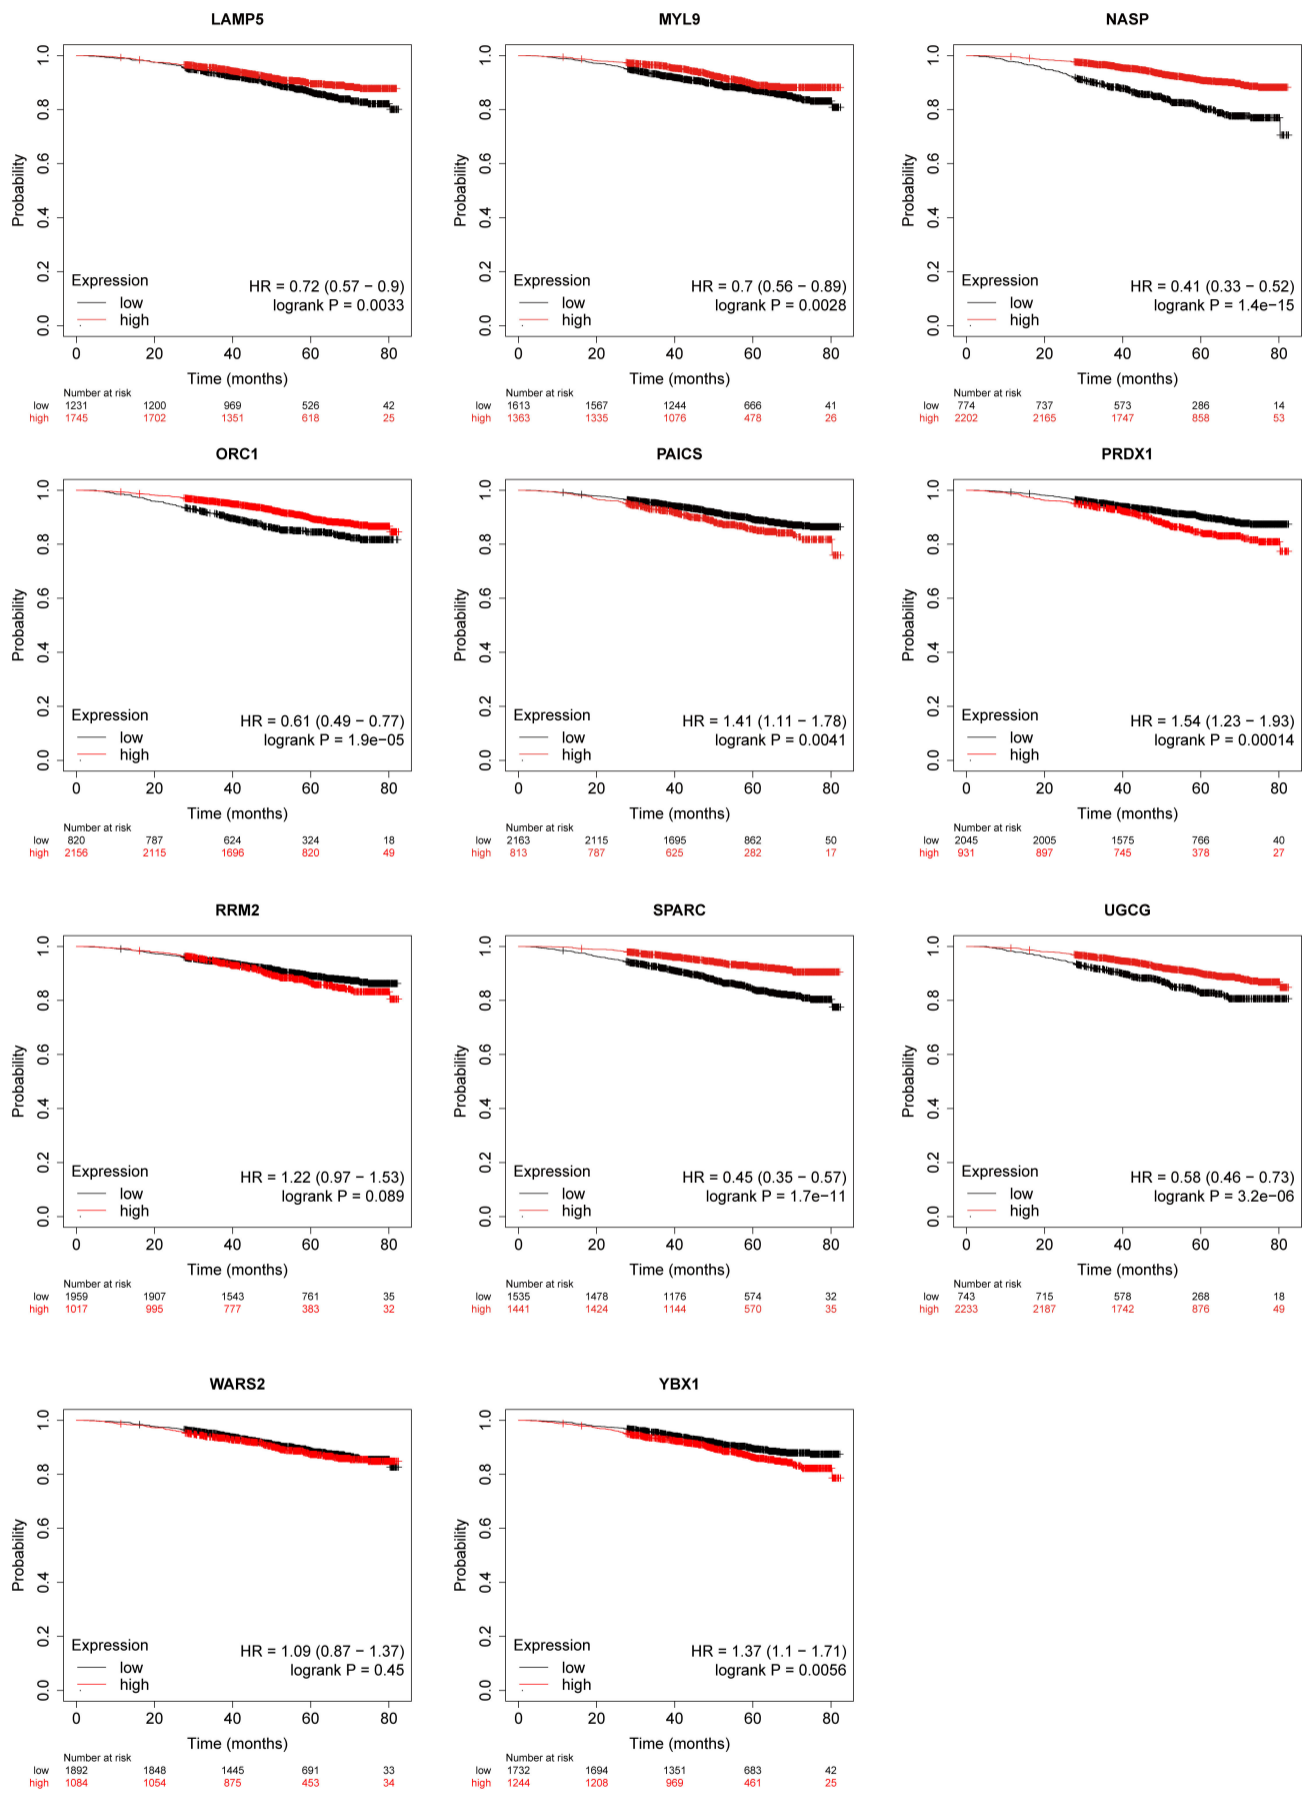

Fig. 5. Kaplan-Meier survival analysis of marker genes.
